# Supplementary material for: Efficiency of Iterative Metal Artifact Reduction Algorithm (iMAR) Applied to Brain Volume Perfusion CT in the Follow-up of Patients after Coiling or Clipping of Ruptured Brain Aneurysms
Source: PubMed Central journal article supplement (PMC6923436; doi:10.1038/s41598-019-55792-6), 2019-12-19
Supplement: 41598_2019_55792_MOESM1_ESM.pdf [file 41598_2019_55792_MOESM1_ESM.pdf]

## Efficiency of Iterative Metal Artifact Reduction Algorithm (iMAR) Applied to Brain Volume Perfusion CT in the Follow-up of Patients after Coiling or Clipping of Ruptured Brain Aneurysms

Arsany Hakim\*, M.D.,<sup>1</sup> Manuela Pastore-Wapp, Ph.D.,<sup>2</sup> Sonja Vulcu, M.D.<sup>3</sup> Tomas Dobrocky, M.D.,<sup>1</sup> Werner J Z'Graggen, M.D.<sup>3</sup> and Franca Wagner, M.D.<sup>1</sup>

### Supplementary material

| P   | Age | Sex | Aneurysm location     | Aneurysm size (DSA) | Aneurysm treatment | No. of coils/clip | Model/material    | Vasospasm | Therapy for vasospasm | No. of CTP | Notes          |
|-----|-----|-----|-----------------------|---------------------|--------------------|-------------------|-------------------|-----------|-----------------------|------------|----------------|
| P1  | 73  | M   | Right ACA             | 9x8x7 mm            | Coiling            | 11                | Target            | No        | --                    | 1          |                |
| P2  | 60  | F   | Basilar tip           | 14.5 x 13 x 16 mm   | Coiling            | 14                | Deltamaxx, Target | Yes       | 3H                    | 2          |                |
| P3  | 51  | F   | Basilar tip           | 5.3 x 4.5 x 6.5 mm  | Coiling            | 7                 | Target            | No        | --                    | 1          |                |
| P4  | 71  | M   | Acom                  | 13 x 7 x 8 mm       | Clipping           | 2                 | Sugita clips      | Yes       | 3H                    | 1          |                |
| P5  | 61  | M   | Right MCA bifurcation | 5 x 6 x 5 mm        | Clipping           | 1                 | Lazic             | Yes       | 3H                    | 3          |                |
| P6  | 68  | F   | Acom                  | N/A                 | Clipping           | 1                 | N/A               | N/A       | N/A                   | 1          | Stroke work-up |
| P7  | 56  | F   | Acom                  | 8 x 5 x 5 mm        | Coiling            | 10                | Target            | Yes       | 3H                    | 3          |                |
| P8  | 50  | F   | Left MCA bifurcation  | 11 x 6.5 x 11 mm    | Clipping           | 1                 | Lazic             | No        | --                    | 1          |                |
| P9  | 55  | F   | Right Pcom            | 8 x 4 x 3.5 mm      | Coiling            | 8                 | Target            | No        | --                    | 1          |                |
| P10 | 58  | F   | Right Pcom            | 7 x 4.4 x 4 mm      | Coiling            | 4                 | Target            | Yes       | 3H                    | 2          |                |

|     |    |   |                 |                |          |    |                    |     |                                 |   |                                                         |
|-----|----|---|-----------------|----------------|----------|----|--------------------|-----|---------------------------------|---|---------------------------------------------------------|
| P11 | 57 | F | Acom            | 7 x 5 x 4 mm   | Coiling  | 5  | Target             | No  | --                              | 1 |                                                         |
| P12 | 52 | M | Right ACA       | 6 x 5 x 4      | Coiling  | 10 | Target             | No  | --                              | 1 |                                                         |
| P13 | 51 | F | Acom            | 7 x 9 x 6 mm   | Coiling  | 8  | Target             | Yes | 3H & Intraarterial nimodipine   | 5 |                                                         |
| P14 | 75 | M | Acom            | 5 x 4 x 5 mm   | Coiling  | 4  | Target             | No  | --                              | 2 |                                                         |
| P15 | 72 | F | Acom            | 5 x 2.5 x 2 mm | Coiling  | 6  | Target             | Yes | 3H & Intraarterial nimodipine   | 3 |                                                         |
| P16 | 59 | M | Left PICA       | N/A            | Coiling  | 4  | Target             | Yes | 3H                              | 3 | Due to dissection, measurement of size was not possible |
| P17 | 69 | F | Left Pcom       | N/A            | Clipping | 1  | N/A                | N/A | N/A                             | 1 | Stroke work-up                                          |
| P18 | 70 | F | Acom            | 2 x 3 x 2      | Coiling  | 2  | Target             | Yes | 3H and intraarterial nimodipine | 3 |                                                         |
| P19 | 61 | F | Right MCA       | 7 x 5 x 5      | Coiling  | 8  | Target             | No  | --                              | 1 |                                                         |
| P20 | 73 | F | Acom            | 16 x 10 x 14   | Coiling  | 7  | Deltamaxx & target | No  | --                              | 1 |                                                         |
| P21 | 79 | F | Acom            | 6 x 4 x 4      | Coiling  | 4  | Target             | Yes | 3H                              | 4 |                                                         |
| P22 | 59 | M | Acom            | 6 x 8 x 7      | Coiling  | 5  | Target             | No  | --                              | 2 |                                                         |
| P23 | 57 | F | Left Pcom       | 7 x 7 x 5      | Coiling  | 6  | Target             | Yes | 3H                              | 1 |                                                         |
| P24 | 65 | F | Right MCA       | 6 x 4 x 2.5    | Clipping | 1  | Lazic              | No  | --                              | 1 |                                                         |
| P25 | 70 | F | Right ACA       | 3 x 3 x 3      | Coiling  | 4  | Target             | No  | --                              | 2 |                                                         |
| P26 | 60 | M | Acom            | 8 x 4 x 5      | Coiling  | 4  | Target             | Yes | 3H & Intraarterial nimodipine   | 1 |                                                         |
| P27 | 57 | M | Acom            | 6 x 9 x 6      | Coiling  | 6  | Target             | Yes | 3H                              | 1 |                                                         |
| P28 | 61 | F | Left distal ICA | 9 x 7 x 7      | Coiling  | 4  | Target             | Yes | 3H                              | 1 |                                                         |
| P29 | 40 | F | Basilar tip     | 2.3 x 4 x 3.7  | Coiling  | 3  | Target             | No  | --                              | 1 |                                                         |

|     |    |   |            |           |         |   |        |     |                               |   |  |
|-----|----|---|------------|-----------|---------|---|--------|-----|-------------------------------|---|--|
| P30 | 74 | F | Right Pcom | 6 x 5 x 6 | Coiling | 6 | Target | Yes | 3H                            | 5 |  |
| P31 | 77 | F | Acom       | 3x3x2.5   | Coiling | 3 | Target | No  | --                            | 1 |  |
| P32 | 64 | M | Acom       | 10x12x7.5 | Coiling | 8 | Target | Yes | 3H & intraarterial nimodipine | 1 |  |

Table 1: Clinical data and foreign materials

CTP: CT perfusion, ACA: anterior cerebral artery, 3H: triple H therapy, Acom: anterior communicating artery, MCA: middle cerebral artery, Pcom: posterior communicating artery, ICA: internal carotid artery, PICA: posterior inferior cerebellar artery, N/A: non applicable.

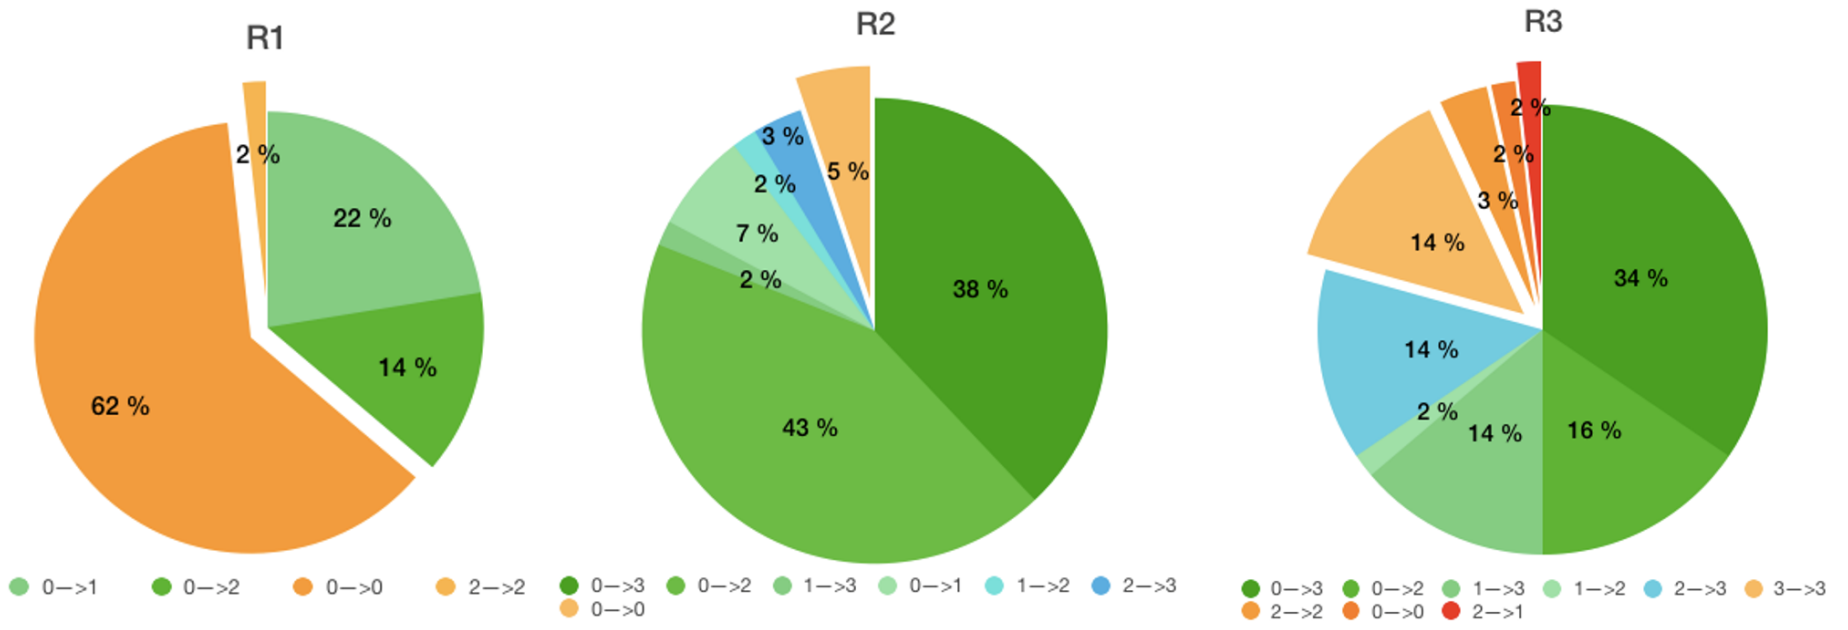

Fig S1: Pie chart of the 3 analysed regions (R1-R3), showing the changes in artifact ratings after application of iMAR (Table 1). The green and blue colours represent reductions in artifact ratings after iMAR application, the orange colour represents unchanged artifact ratings and the red color represents increased artifact ratings after iMAR application. The central tendency differs significantly between the groups (corrected and uncorrected), R1:  $z=4.16$ ,  $p<0.001$ , R2:  $z=6.59$ ,  $p<0.001$ , R3:  $z=6.01$ ,  $p<0.001$ .

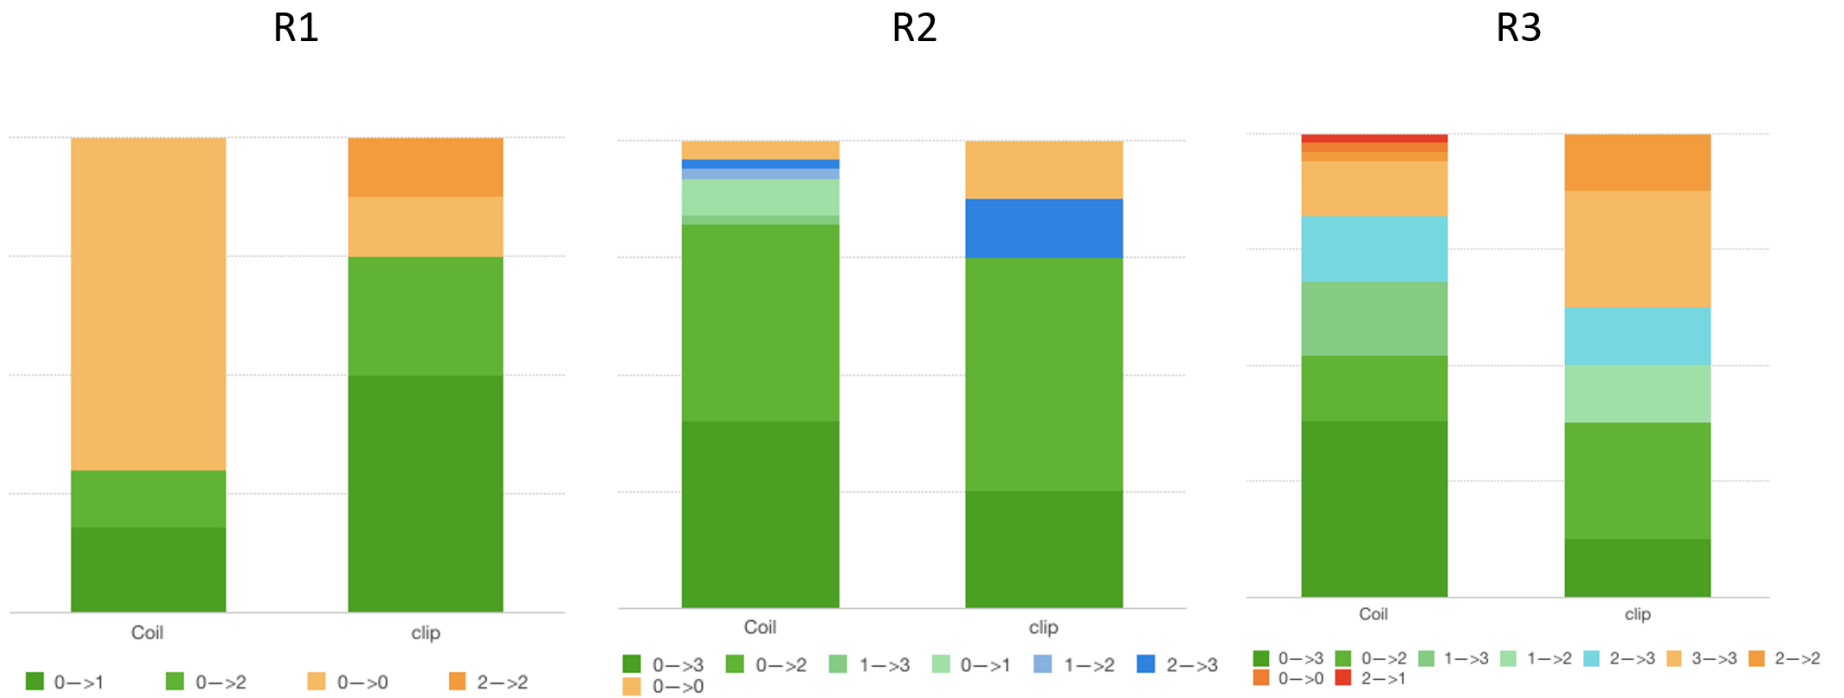

Fig S2: Stacked column chart comparing artifact reduction between patients with clips and those with coils in the 3 analysed regions. In R1, the improvement was significantly better in patients with clips, and in R2 and R3, the improvement was better in patients with coils. But the difference was not statistically significant.

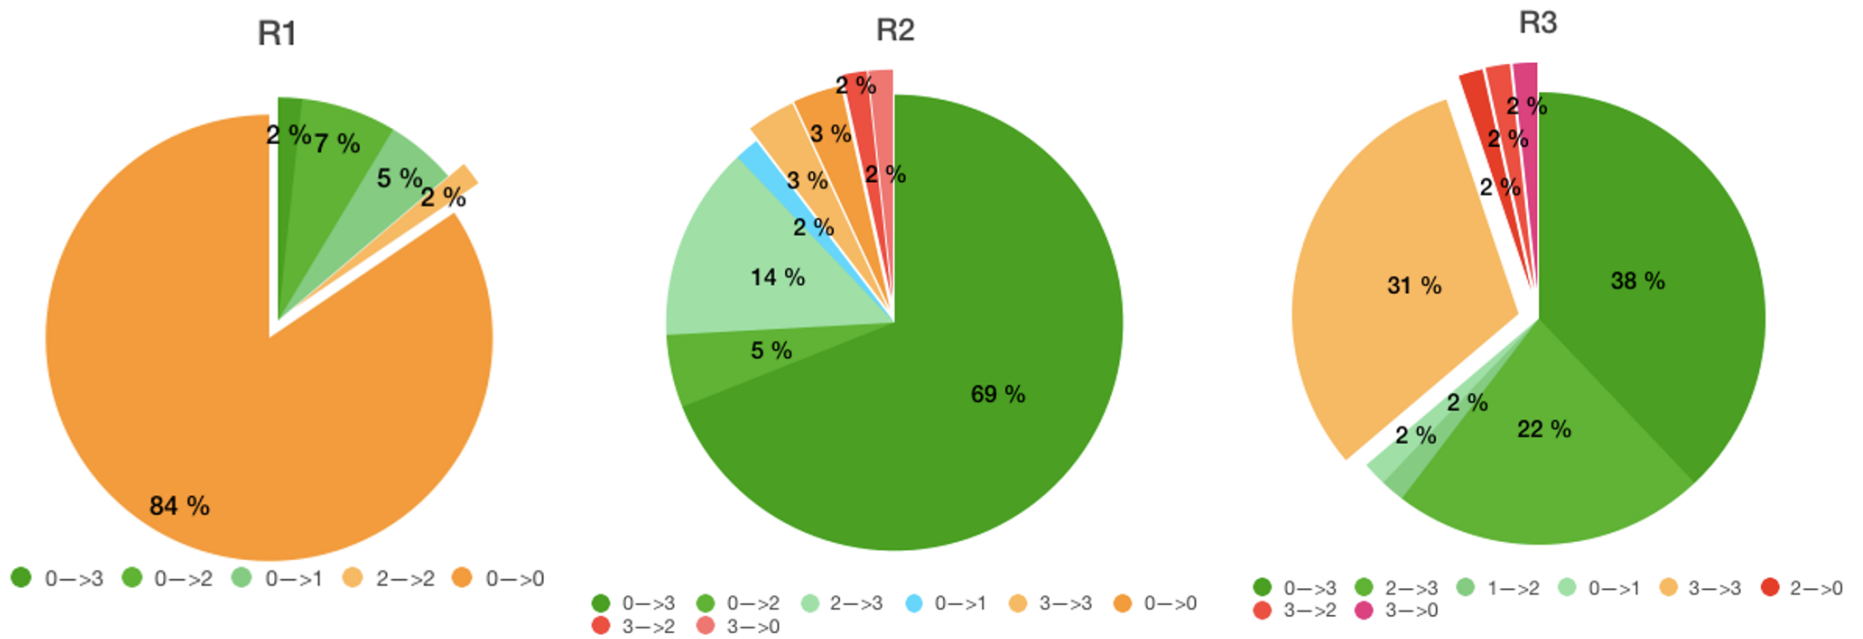

Fig S3: Pie chart of the 3 analysed regions (R1-R3), showing the changes in the image quality after iMAR application (Table 1). The green and blue colours represent improved image quality, the orange colour represents no change, and the red color represents reduced quality. The central tendency differed significantly between the groups (corrected and uncorrected), R1:  $z=2.57$ ,  $p=0.01$ , R2:  $z=6.41$ ,  $p<0.001$ , R3:  $z=4.90$ ,  $p<0.001$ .

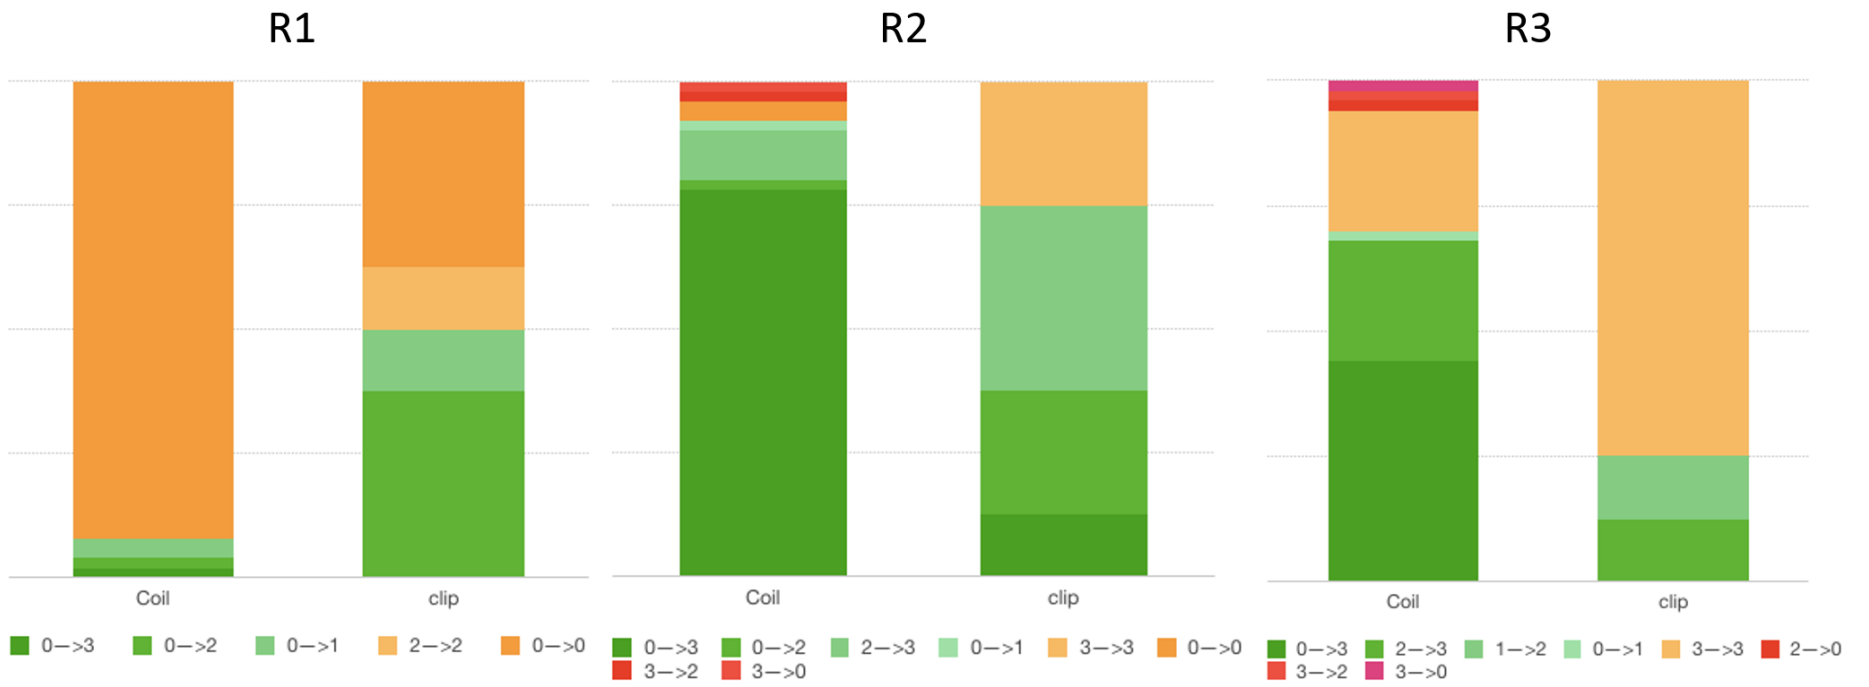

Fig S4: Stacked column chart comparing image quality improvement between patients with coils and those with clips. In R1, the improvement was better in patients with clips. In R2 and R3, the improvement was better in patients with coils.

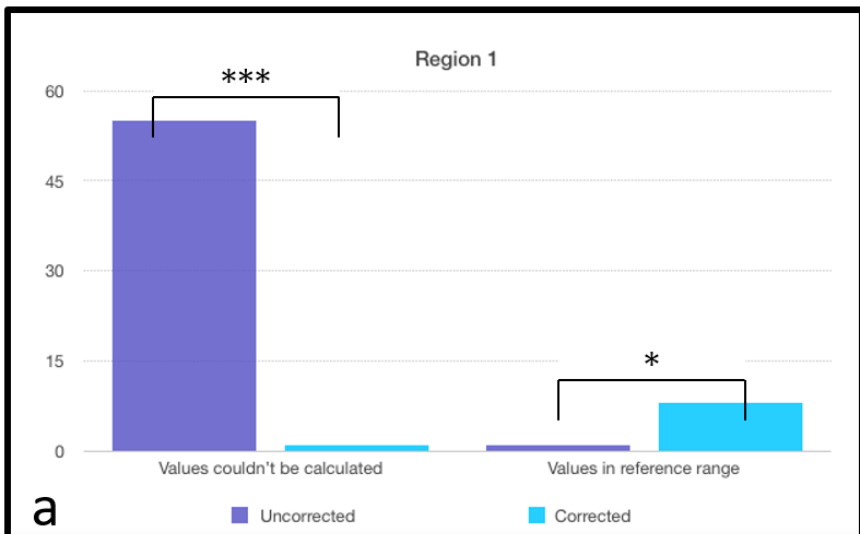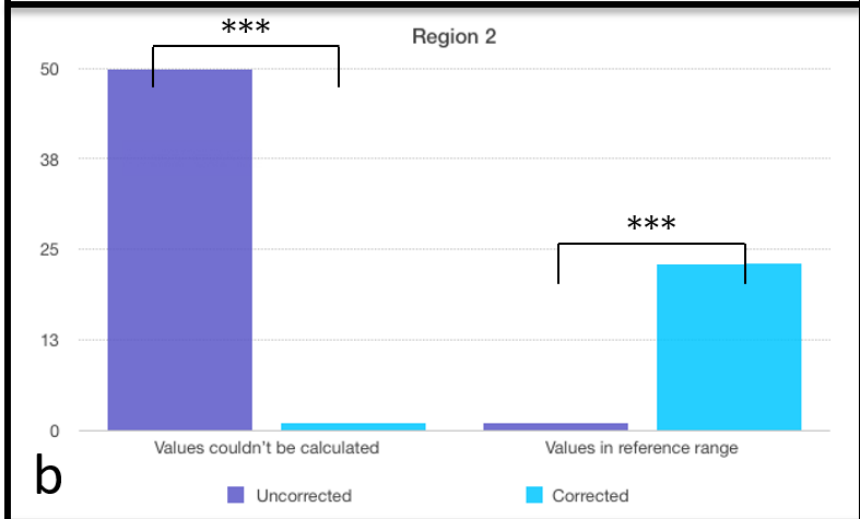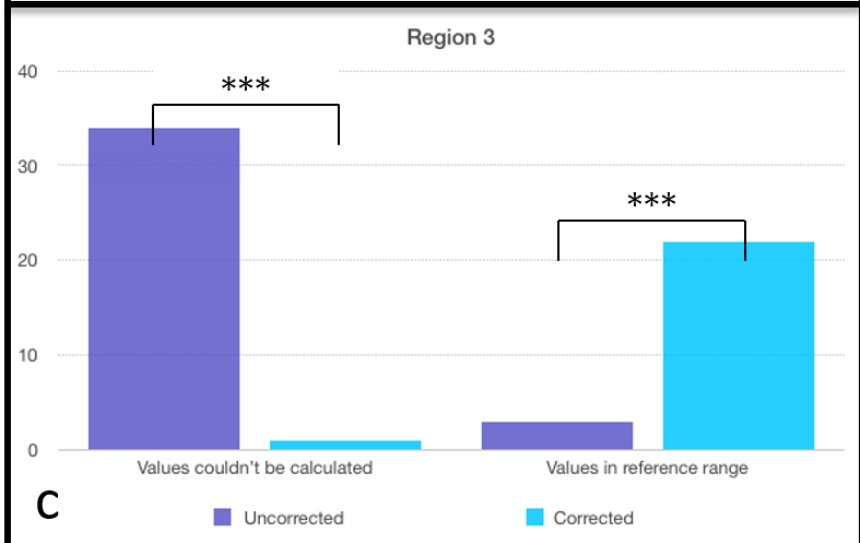

Fig S5: Column charts of the 3 different regions of analysis: a) region 1, b) region 2, and c) region 3, depicting the comparison between the corrected (light blue) and uncorrected (dark blue) datasets in the number (y-axis) of ROIs that could not be calculated due to software error and in the number of ROIs obtained within the reference range. The results of the comparison were statistically significant. \*  $p < 0.05$ , \*\*  $p < 0.01$ , \*\*\*  $p < 0.001$ .



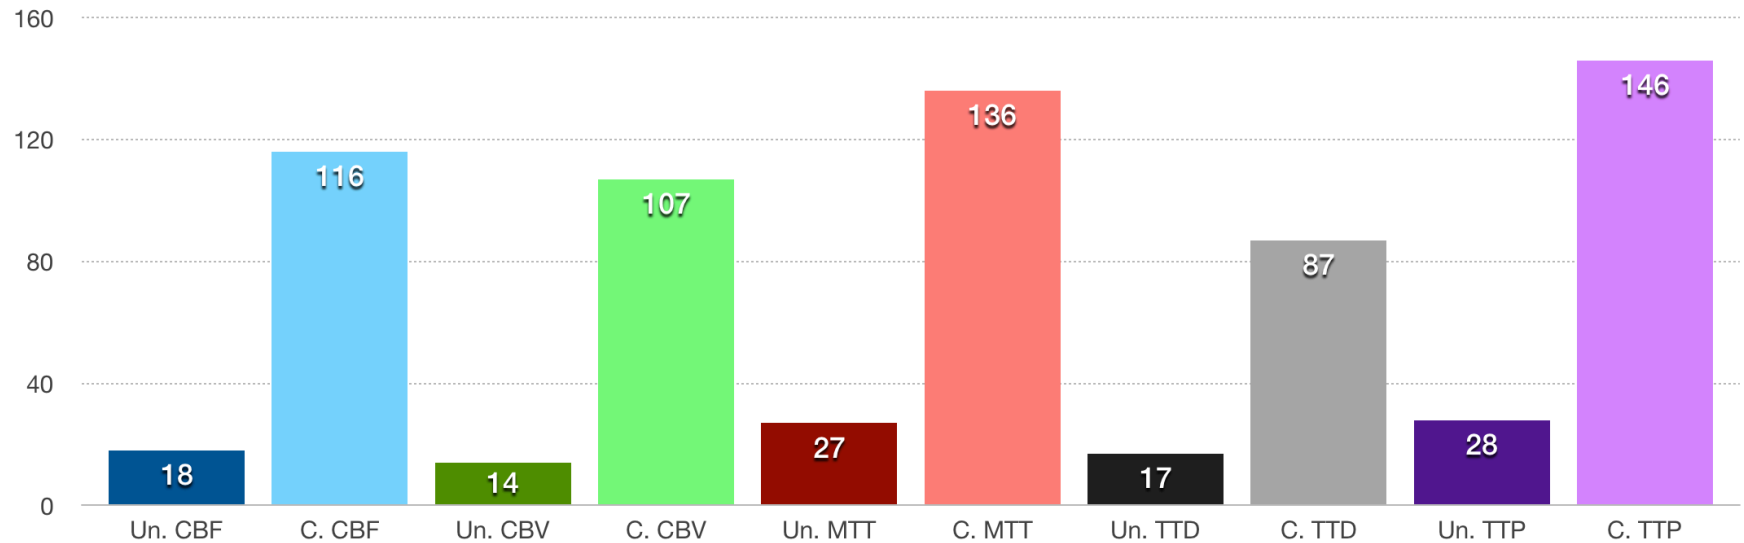

Fig S6: Column bars of the different perfusion parameters obtained from the uncorrected (Un.) and corrected (C.) datasets with the frequency (y-axis) of each parameter within the reference range showing an overall increase in the number of ROIs with perfusion values within the reference range in the corrected dataset, i.e., after the application of iMAR. The bars also show that TTP gave the best results and MTT the second-best. The results of the statistical analysis were not significant in the uncorrected dataset (chi-square = 8.7,  $p = 0.07$ ) but were significant in the corrected dataset (chi-square = 66.62,  $p < 0.001$ ). CBF = cerebral blood flow, CBV = cerebral blood volume, MTT = mean transit time, TTD = time to drain, TTP = time to peak.
